# Supplementary material for: Human heart valve-derived scaffold improves cardiac repair in a murine model of myocardial infarction
Source: PubMed Central journal article supplement (PMC5209673; doi:10.1038/srep39988), 2017-01-04
Supplement: srep39988-s1.pdf [file srep39988-s1.pdf]

**Title: Human heart valve-derived scaffold improves cardiac repair in a murine model of myocardial infarction**

**Authors:** Long Wan, Yao Chen, Zhenhua Wang, Weijun Wang, Sebastian Schmall, Jun Dong, Song Xue, Hans Imboden, Jun Li

## Supplementary information

Figure S1

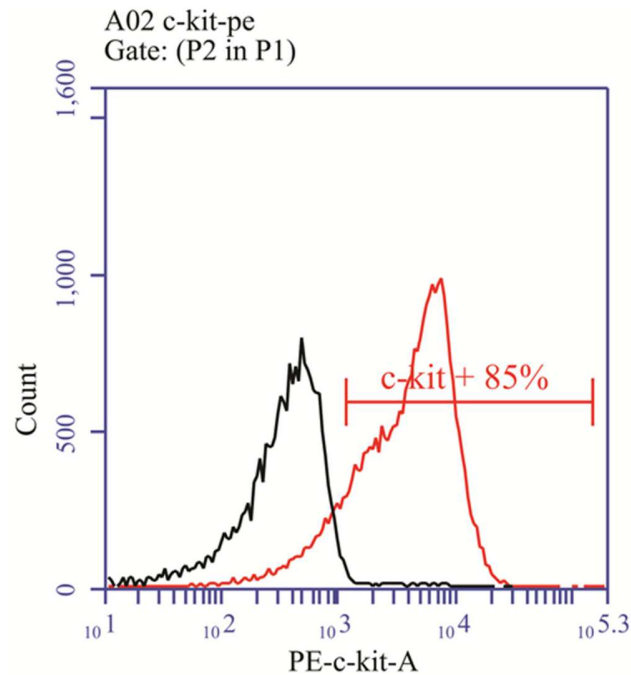

**Supplementary Figure S1 | The purity of isolated murine BM c-kit+ cells.** Murine BM was flushed from femurs and tibias on day 3 after MI. Following density gradient sedimentation, the c-kit+ cells were positively selected using magnetic activated cell sorting (MACS). The purity of isolated c-kit+ cells is around 85%, as determined by an Accuri C6 flow cytometer with CFlow Plus Software. Data shown are representative of 3 independent experiments.

Figure S2

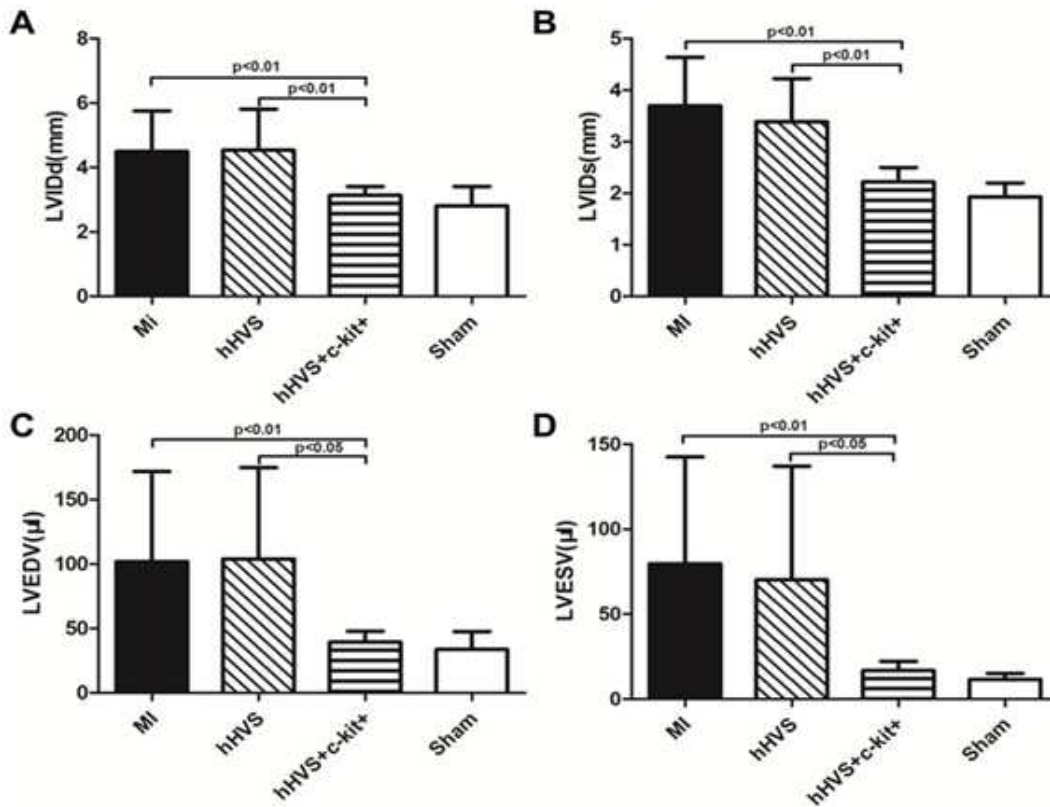

**Supplementary Figure S2 | The c-kit+ cell-seeded hHVS is superior to hHVS alone in improving cardiac function. (A-D):** Comparisons of echocardiographic parameters of MI (without patch implantation), hHVS (MI with implantation of the hHVS alone), hHVS + c-kit+ (MI with implantation of c-kit+ cell-seeded hHVS), and sham groups 4 weeks after MI/implantation. LVIDd, end-diastolic left ventricular dimension; LVIDs, end-systolic left ventricular dimension; LVEDV, left ventricular end-diastolic volume; LVESV, left ventricular end-systolic volume. MI, n=10; hHVS, n=10; hHVS + c-kit+, n=10; sham, n=7.

Figure S3

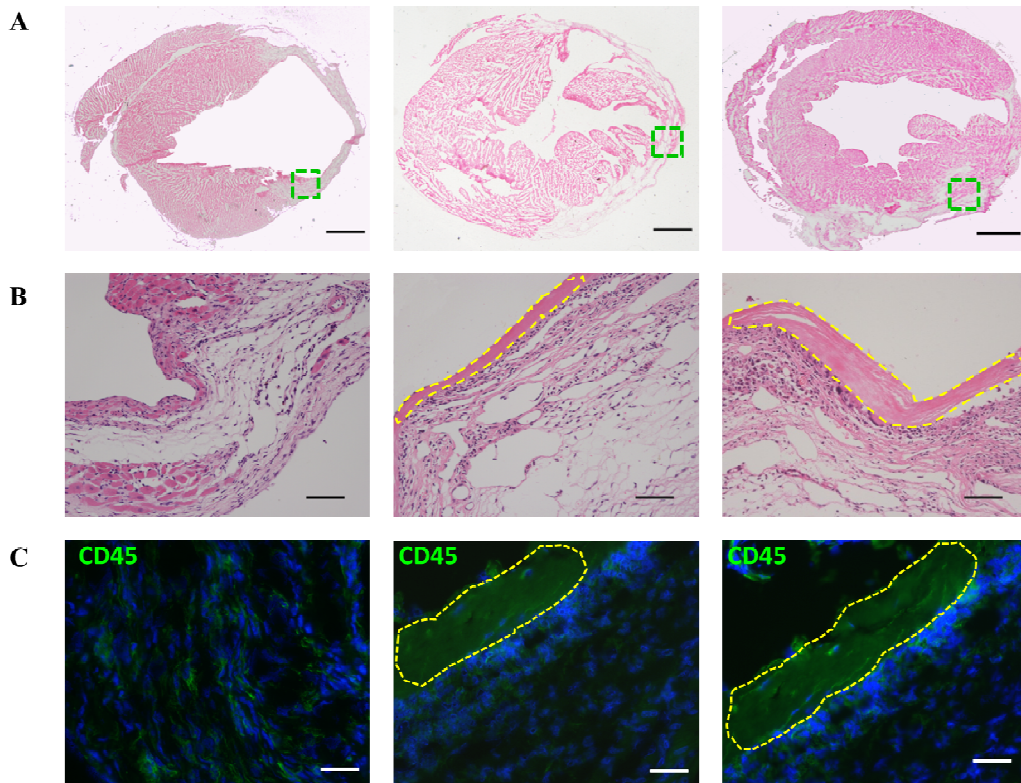

**Supplementary Figure S3 | No increased infiltration of CD45+ leucocytes after implantation of hHVS or c-kit+ cell-seeded hHVS.** HE staining (a, b) and immunofluorescent staining (c) showing that an increased infiltration of CD45+ leucocytes (in green) into infarcted myocardium was not additionally induced 4 weeks after implantation of the hHVS alone or c-kit+ cell-seeded hHVS. Green and yellow dotted lines indicate the region analyzed for immunofluorescent staining and implanted hHVS, respectively. (a), Scale bar, 1 mm; (b, c), Scale bar, 50  $\mu$ m. Data shown are representative of 5 independent experiments.

Figure S4

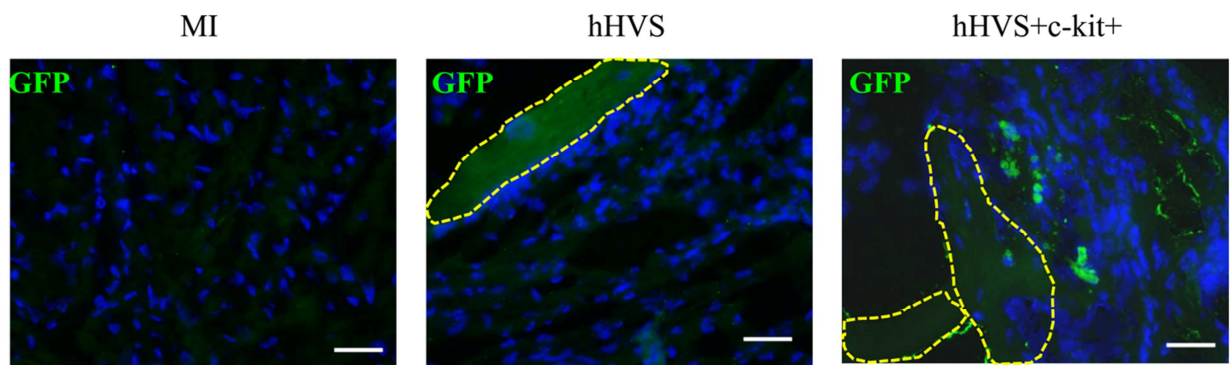

**Supplementary Figure S4 | Detection of engrafted donor GFP+ cells in the periinfarct myocardia of recipient MI mice.** Immunofluorescent staining of heart sections showing engrafted donor GFP+ cells (in green) surrounding the periinfarct myocardia of recipient MI mice 4 weeks after implantation of GFP+c-kit+ cell-seeded hHVS. The GFP+ cell is absent in the infarcted heart of MI mice with or without implantation of the hHVS. Yellow dotted lines indicate the implanted hHVS or GFP+c-kit+ cell-seeded hHVS. Data shown are representative of 5 independent experiments. Nuclei (in blue) are stained with DAPI; Scale bar, 50  $\mu\text{m}$ .

**Supplementary Table 1**

**Echocardiography and hemodynamic parameters 4 weeks after cardiac patch implantation**

|                                      | MI            | hHVS            | hHVS+c-kit+       | Sham                |
|--------------------------------------|---------------|-----------------|-------------------|---------------------|
| <b>Echocardiographic examination</b> |               |                 |                   |                     |
| EF (%)                               | 25.27±2.64    | 38.27±2.57*     | 58.91±2.93***&&   | 68.20±2.27***&&S    |
| FS (%)                               | 12.27±1.46    | 18.71±2.54*     | 30.40±1.81***&&   | 37.15±1.76***&&S    |
| LVIDd (mm)                           | 5.12±0.40     | 3.91±0.40       | 3.14±0.09*~&&     | 2.81±0.23*~&&       |
| LVIDs (mm)                           | 4.49±0.46     | 3.23±0.23       | 2.22±0.09*~&&     | 1.93±0.10***&&      |
| LV mass (mg)                         | 67.93±12.02   | 80.90±14.58     | 40.35±2.25*~&     | 42.83±5.02*         |
| LVEDV (μl)                           | 102.00±22.04  | 103.90±22.38    | 39.47±2.67*~&     | 33.83±5.17*~&       |
| LVESV (μl)                           | 79.67±19.87   | 70.27±21.10     | 16.98±1.65*~&     | 11.32±1.90***&S     |
| <b>Hemodynamic parameters</b>        |               |                 |                   |                     |
| CO (μl/min)                          | 2609 ± 265.3  | 3689 ± 180.0**  | 4860 ± 148.0***&& | 6168 ± 198.6***&&SS |
| SV (μl)                              | 5.64 ± 0.68   | 10.80 ± 0.53**  | 14.06 ± 0.36***&& | 17.20 ± 1.23***&&S  |
| LVESP (mmHg)                         | 65.15 ± 3.48  | 78.33 ± 1.30**  | 84.76 ± 1.57***~& | 81.08± 1.67***&&    |
| LVEDP (mmHg)                         | 7.08 ± 0.89   | 5.78 ± 0.79**   | 5.26 ± 0.85**     | 3.68 ± 1.52***&&S   |
| dP/dt max (mmHg/s)                   | 2892 ± 218.6  | 4632 ± 132.7**  | 5010 ± 89.16***~& | 5769 ± 297.7***~&   |
| dP/dt min (mmHg/s)                   | -2253 ± 159.0 | -3328 ± 85.40** | -3585 ± 76.36**   | -4509 ± 208.8***&S  |
| Tau (ms)                             | 23.28 ± 1.72  | 13.84 ± 0.59**  | 12.63 ± 0.54**    | 9.65 ± 0.65***&&S   |

**Supplementary Table 1. Echocardiography and hemodynamic parameters (Millar pressure-volume catheter) of MI (without patch implantation), hHVS (MI with implantation of the hHVS alone), hHVS + c-kit+ (MI with implantation of c-kit+ cell-seeded hHVS), and sham groups 4 weeks after MI/implantation.** CO= cardiac output; dP/dt max= maximal rate of rise of left ventricular diastolic pressure; dP/dt min= minimal rate of rise of left ventricular diastolic pressure; LVEDV= left ventricular end-diastolic volume; LVEDP=left ventricular end-diastolic pressure; LVESP= left ventricular end-systolic pressure; LV mass= left ventricular mass; LVESV= left ventricular end-systolic volume; LVIDd= end-diastolic left ventricular dimension, LVIDs= end-systolic left ventricular dimension; SV= stroke volume; Tau=left ventricular

relaxation time constant. MI, n=10; hHVS, n=10; hHVS + c-kit+, n=10; sham, n=7; \* $p < 0.05$ , \*\* $p < 0.01$  vs. MI; & $p < 0.05$ , && $p < 0.01$  vs. hHVS; \$ $p < 0.05$ , \$\$ $p < 0.01$  vs. hHVS + c-kit+.
